# Supplementary material for: Ecosystem carbon stocks of mangroves across broad environmental gradients in West-Central Africa: Global and regional comparisons
Source: PubMed Central journal article supplement (PMC5683642; doi:10.1371/journal.pone.0187749), 2017-11-13
Supplement: pone.0187749.s002.pdf [file pone.0187749.s002.pdf]

S2 Table. Ecosystem carbon stocks in Liberia, Senegal and Gabon (north and south). Numbers are mean stocks  $\pm$  one standard error.

| Location/sample site | Carbon stocks (Mg C ha <sup>-1</sup> ) partitioned into various ecosystem pools |              |                 |                   |                 | Fraction (%) of total ecosystem C |            |       |
|----------------------|---------------------------------------------------------------------------------|--------------|-----------------|-------------------|-----------------|-----------------------------------|------------|-------|
|                      | Downed wood                                                                     | Vegetation   | Soil (0-100 cm) | Total soil carbon | Total ecosystem | Downed wood                       | Vegetation | Soils |
| <b>Liberia</b>       |                                                                                 |              |                 |                   |                 |                                   |            |       |
| <b>NCM1</b>          | 2.3 $\pm$ 0.6                                                                   | 16 $\pm$ 4   | 334 $\pm$ 23    | 843 $\pm$ 53      | 862 $\pm$ 53    | 0.3                               | 1.9        | 97.8  |
| <b>NCT2</b>          | 3.3 $\pm$ 0.9                                                                   | 64 $\pm$ 13  | 428 $\pm$ 17    | 1418 $\pm$ 75     | 1484 $\pm$ 73   | 0.2                               | 4.3        | 95.6  |
| <b>NCT3</b>          | 12.4 $\pm$ 3.2                                                                  | 162 $\pm$ 28 | 360 $\pm$ 36    | 1203 $\pm$ 43     | 1382 $\pm$ 44   | 0.9                               | 11.7       | 87.0  |
| <b>NCM4</b>          | 2.8 $\pm$ 0.5                                                                   | 36 $\pm$ 6   | 332 $\pm$ 14    | 1069 $\pm$ 39     | 1108 $\pm$ 38   | 0.3                               | 3.2        | 96.5  |
| <b>NCM5</b>          | 1.6 $\pm$ 0.6                                                                   | 6 $\pm$ 1    | 348 $\pm$ 25    | 358 $\pm$ 28      | 366 $\pm$ 29    | 0.4                               | 1.6        | 97.8  |
| <b>NCT6</b>          | 4.2 $\pm$ 1.3                                                                   | 75 $\pm$ 18  | 309 $\pm$ 31    | 910 $\pm$ 77      | 989 $\pm$ 80    | 0.4                               | 7.6        | 92.0  |
| <b>MRT7</b>          | 8.4 $\pm$ 0.5                                                                   | 30 $\pm$ 8   | 386 $\pm$ 19    | 1104 $\pm$ 58     | 1142 $\pm$ 51   | 0.7                               | 2.6        | 96.7  |
| <b>MRM8</b>          | 2.6 $\pm$ 0.5                                                                   | 7 $\pm$ 3    | 286 $\pm$ 19    | 530 $\pm$ 37      | 540 $\pm$ 39    | 0.5                               | 1.3        | 98.1  |
| <b>MRT9</b>          | 8 $\pm$ 3                                                                       | 30 $\pm$ 7   | 299 $\pm$ 12    | 710 $\pm$ 51      | 748 $\pm$ 54    | 1.1                               | 4.0        | 94.9  |
| <b>BRM10</b>         | 2.8 $\pm$ 0.8                                                                   | 5 $\pm$ 2    | 338 $\pm$ 29    | 858 $\pm$ 115     | 866 $\pm$ 116   | 0.3                               | 0.6        | 99.1  |
| <b>Senegal</b>       |                                                                                 |              |                 |                   |                 |                                   |            |       |
| <b>Mounde</b>        | 0 $\pm$ 0                                                                       | 11 $\pm$ 2   | 278 $\pm$ 22    | 436 $\pm$ 60      | 448 $\pm$ 59    | 0.0                               | 2.5        | 97.3  |
| <b>Baouth</b>        | 0 $\pm$ 0                                                                       | 12 $\pm$ 2   | 255 $\pm$ 14    | 634 $\pm$ 39      | 646 $\pm$ 40    | 0.0                               | 1.9        | 98.1  |
| <b>Diamniadio</b>    | 0.8 $\pm$ 0.3                                                                   | 62 $\pm$ 25  | 257 $\pm$ 14    | 876 $\pm$ 68      | 940 $\pm$ 89    | 0.1                               | 6.6        | 93.2  |
| <b>Djirnda</b>       | 0.6 $\pm$ 0.2                                                                   | 122 $\pm$ 43 | 300 $\pm$ 12    | 811 $\pm$ 32      | 933 $\pm$ 46    | 0.1                               | 13.1       | 86.9  |
| <b>Fambine</b>       | 2.2 $\pm$ 0.4                                                                   | 83 $\pm$ 20  | 236 $\pm$ 22    | 694 $\pm$ 62      | 779 $\pm$ 71    | 0.3                               | 10.7       | 89.1  |
| <b>Sang</b>          | 0 $\pm$ 0                                                                       | 23 $\pm$ 6   | 111 $\pm$ 8     | 273 $\pm$ 15      | 296 $\pm$ 15    | 0.0                               | 7.8        | 92.2  |

S2 Table (Continued)

| Sample site               | Carbon stocks (Mg C ha <sup>-1</sup> ) partitioned into various ecosystem pools |            |                 |                   |                 | Fraction (%) of total ecosystem C |            |       |
|---------------------------|---------------------------------------------------------------------------------|------------|-----------------|-------------------|-----------------|-----------------------------------|------------|-------|
|                           | Downed wood                                                                     | Vegetation | Soil (0-100 cm) | Total soil carbon | Total ecosystem | Downed wood                       | Vegetation | Soils |
| <b>Gabon North</b>        |                                                                                 |            |                 |                   |                 |                                   |            |       |
| <b>Nzeme</b>              | 28.5 ± 9.9                                                                      | 187 ± 35   | 324 ± 22        | 924 ± 79          | 1140 ± 107      | 2.5                               | 16.4       | 81.1  |
| <b>Mud bank</b>           | 7.5 ± 1                                                                         | 36 ± 5     | 401 ± 19        | 852 ± 29          | 896 ± 28        | 0.8                               | 4.0        | 95.1  |
| <b>Moka</b>               | 7.6 ± 2.7                                                                       | 104 ± 19   | 324 ± 16        | 864 ± 35          | 975 ± 47        | 0.8                               | 10.7       | 88.6  |
| <b>Moka River II</b>      | 17.2 ± 5.8                                                                      | 206 ± 80   | 371 ± 26        | 949 ± 33          | 1172 ± 59       | 1.5                               | 17.6       | 81.0  |
| <b>Bambouchine</b>        | 16.9 ± 8.8                                                                      | 164 ± 40   | 333 ± 16        | 872 ± 20          | 1053 ± 34       | 1.6                               | 15.6       | 82.8  |
| <b>Massotie</b>           | 12.6 ± 6.9                                                                      | 380 ± 160  | 315 ± 21        | 770 ± 41          | 1163 ± 170      | 1.1                               | 32.7       | 66.2  |
| <b>Nzeme River II</b>     | 28.8 ± 6.7                                                                      | 185 ± 40   | 346 ± 15        | 827 ± 43          | 1041 ± 68       | 2.8                               | 17.8       | 79.4  |
| <b>Gabon South</b>        |                                                                                 |            |                 |                   |                 |                                   |            |       |
| <b>Jardin du Elephant</b> | 41.7 ± 26.7                                                                     | 3 ± 1      | 98 ± 9          | 109 ± 16          | 154 ± 26        | 27.1                              | 1.9        | 70.8  |
| <b>Case Shell</b>         | 2 ± 0.9                                                                         | 25 ± 11    | 159 ± 39        | 308 ± 53          | 335 ± 64        | 0.6                               | 7.5        | 91.9  |
| <b>Mwana Mouele</b>       | 13.5 ± 4.4                                                                      | 75 ± 10    | 88 ± 17         | 452 ± 17          | 541 ± 22        | 2.5                               | 13.9       | 83.5  |
| <b>Mwana Mouele South</b> | 11.4 ± 2                                                                        | 314 ± 100  | 57 ± 9          | 208 ± 34          | 533 ± 95        | 2.1                               | 58.9       | 39.0  |
| <b>Lac Simba Deux</b>     | 9.7 ± 5.4                                                                       | 221 ± 120  | 264 ± 45        | 547 ± 102         | 778 ± 147       | 1.2                               | 28.4       | 70.3  |
| <b>Lac Simba</b>          | 13.2 ± 3.6                                                                      | 301 ± 65   | 236 ± 35        | 511 ± 88          | 825 ± 135       | 1.6                               | 36.5       | 61.9  |
| <b>Lac Sounga Deux</b>    | 6.9 ± 3                                                                         | 53 ± 21    | 177 ± 39        | 332 ± 90          | 392 ± 96        | 1.8                               | 13.5       | 84.7  |
| <b>Lac Sounga</b>         | 5.6 ± 2.9                                                                       | 156 ± 38   | 225 ± 15        | 318 ± 23          | 480 ± 53        | 1.2                               | 32.5       | 66.3  |
| <b>Paga</b>               | 10.6 ± 6.5                                                                      | 173 ± 88   | 219 ± 17        | 300 ± 20          | 484 ± 72        | 2.2                               | 35.7       | 62.0  |
| <b>Ndougou</b>            | 1.2 ± 0.3                                                                       | 34 ± 11    | 389 ± 85        | 838 ± 129         | 872 ± 132       | 0.1                               | 3.9        | 96.1  |
